# Supplementary material
Source: MDPI journal article supplement (https://www.mdpi.com/2306-5710/7/2/29)
Supplement: s1 [file s1]

*Supplementary Material*

# **Aroma and Sensory Profiles of Sauvignon Blanc Wines from Commercially Produced Free Run and Pressed Juices**

**Katie Parish-Virtue <sup>1</sup>, Mandy Herbst-Johnstone <sup>1,†</sup>, Flo Bouda <sup>2</sup>, Bruno Fedrizzi <sup>1</sup>, Rebecca C. Deed <sup>1,3</sup> and Paul A. Kilmartin <sup>1,\*</sup>**

<sup>1</sup> Wine Science Programme, School of Chemical Sciences, The University of Auckland, Private Bag, Auckland 92019, New Zealand; kpar121@aucklanduni.ac.nz (K.P.-V.); mandy.herbst-johnstone@gribbles.co.nz (M.H.-J.); b.fedrizzi@auckland.ac.nz (B.F.); rebecca.deed@auckland.ac.nz (R.C.D.)

<sup>2</sup> Delegat Limited, Auckland 92019, New Zealand; flo.bouda@delegat.com

<sup>3</sup> School of Biological Sciences, The University of Auckland, Auckland 1142, New Zealand

\* Correspondence: p.kilmartin@auckland.ac.nz

† Current address: Gribbles Scientific, Dunedin, New Zealand.

**Table S1.** Compounds identified during the GC-MS analysis of the experimental wines along with their respective retention times, ions used for qualification and quantification as well as the R<sup>2</sup> of their calibration equation.

| Aroma Compound                | Retention Time (min) | Ions ( <i>m/z</i> )*    | R <sup>2</sup> |
|-------------------------------|----------------------|-------------------------|----------------|
| <i>Alcohols/Aldehydes</i>     |                      |                         |                |
| Isobutanol                    | 9.7                  | <b>41</b> , 43, 74      | 0.9994         |
| Butan-1-ol                    | 11.7                 | <b>56</b> , 31, 41      | 0.9997         |
| Isoamyl alcohol               | 14.9                 | <b>70</b> , 55, 42      | 0.9999         |
| Methionol                     | 43.4                 | <b>106</b> , 61, 58     | 0.9991         |
| Benzyl alcohol                | 49.8                 | <b>108</b> , 79, 107    | 0.9994         |
| Phenylethyl alcohol           | 51.9                 | <b>91</b> , 92, 122     | 0.9996         |
| Benzaldehyde                  | 31.7                 | <b>106</b> , 77, 105    | 0.9988         |
| <i>C<sub>6</sub>-Alcohols</i> |                      |                         |                |
| Hexanol                       | 23.3                 | <b>56</b> , 43, 69      | 0.9995         |
| <i>trans</i> -3-Hexen-1-ol    | 23.4                 | <b>82</b> , 41, 67      | 0.9996         |
| <i>cis</i> -3-Hexen-1-ol      | 24.4                 | <b>67</b> , 41, 82      | 0.9996         |
| <i>Cinnamates</i>             |                      |                         |                |
| Ethyl cinnamate               | 64.6                 | <b>131</b> , 103, 176   | 0.9951         |
| Ethyl dihydrocinnamate        | 54.6                 | <b>104</b> , 91, 107    | 0.9991         |
| <i>Esters</i>                 |                      |                         |                |
| Ethyl isobutyrate             | 9.5                  | <b>71</b> , 43, 116, 88 | 0.9995         |
| Ethyl butanoate               | 11.7                 | <b>88</b> , 75, 101     | 0.9997         |
| Ethyl isovalerate             | 14.4                 | <b>88</b> , 85, 115     | 0.9995         |
| Ethyl hexanoate               | 24.8                 | <b>88</b> , 99, 101     | 0.9994         |
| Ethyl octanoate               | 39.5                 | <b>88</b> , 101, 127    | 0.9994         |
| Ethyl decanoate               | 52.4                 | <b>88</b> , 101, 155    | 0.9988         |
| Ethyl dodecanoate             | 63.9                 | <b>88</b> , 101, 183    | 0.9955         |
| Isobutyl acetate              | 10.5                 | <b>56</b> , 43, 73      | 0.9996         |
| Isoamyl acetate               | 16.4                 | <b>87</b> , 70, 55      | 0.9992         |
| Hexyl acetate                 | 26.2                 | <b>61</b> , 56, 84      | 0.9997         |
| <i>cis</i> -3-Hexenyl acetate | 26.6                 | <b>67</b> , 43, 82      | 0.9997         |
| $\beta$ -Phenylethyl acetate  | 50.1                 | <b>43</b> , 104, 91     | 0.9995         |
| Methyl octanoate              | 34.1                 | <b>74</b> , 87, 127     | 0.9992         |
| Ethyl-(L)-lactate             | 21.8                 | <b>45</b> , 43, 75      | 0.9995         |
| Diethyl succinate             | 43.6                 | <b>101</b> , 129, 73    | 0.9993         |
| <i>Fatty Acids</i>            |                      |                         |                |
| Isobutyric acid               | 33.9                 | <b>43</b> , 73, 88      | 0.9987         |
| Hexanoic acid                 | 49.0                 | <b>60</b> , 73, 87      | 0.9965         |
| Octanoic acid                 | 60.1                 | <b>60</b> , 73, 101     | 0.9991         |
| Decanoic acid                 | 70.1                 | <b>60</b> , 73, 129     | 0.9983         |
| <i>Methoxypyrazines</i>       |                      |                         |                |
| IBMP                          | 20.0                 | <b>124</b> , 151, 166   | 0.9997         |
| <i>Norisoprenoids</i>         |                      |                         |                |
| $\beta$ -Damascenone          | 54.2                 | <b>121</b> , 69, 190    | 0.9988         |
| $\beta$ -Ionone               | 60.4                 | <b>177</b> , 178, 192   | 0.9988         |
| <i>Terpenes</i>               |                      |                         |                |
| <i>cis/trans</i> -Rose oxide  | 32.8                 | <b>139</b> , 69, 83     | 0.9998         |
| Linalool                      | 37.0                 | <b>93</b> , 71, 121     | 0.9995         |
| $\alpha$ -Terpineol           | 44.7                 | <b>59</b> , 93, 121     | 0.9994         |
| $\beta$ -Citronellol          | 48.1                 | <b>69</b> , 41, 82, 123 | 0.9994         |
| Nerol                         | 49.3                 | <b>69</b> , 41, 93, 121 | 0.9996         |
| <i>Thiols</i>                 |                      |                         |                |
| 3MH                           | 42.7                 | <b>134</b> , 100        | 0.9980         |
| 3MHA                          | 38.5                 | <b>116</b> , 101        | 0.9990         |
| <i>Vinyl Phenols</i>          |                      |                         |                |
| 4-Vinylphenol                 | 73.2                 | <b>120</b> , 91         | 0.9988         |
| 4-Vinylguaiaicol              | 65.3                 | <b>150</b> , 135, 107   | 0.9988         |

\*Ions used for quantification are in bold.



**Table S4.** Averages and standard deviations ( $\pm$ ) of the fermentation triplicates for some basic wine parameters after fermentation.

|                              | Wairau Valley (A)           |                             |                              | Awatere Valley (B)          |                              |                             |
|------------------------------|-----------------------------|-----------------------------|------------------------------|-----------------------------|------------------------------|-----------------------------|
|                              | FR                          | LP                          | HP                           | FR                          | LP                           | HP                          |
| pH                           | 2.9 $\pm$ 0.0 <sup>a</sup>  | 3.9 $\pm$ 0.0 <sup>b</sup>  | 4.5 $\pm$ 0.0 <sup>c</sup>   | 3.2 $\pm$ 0.0 <sup>a</sup>  | 4.0 $\pm$ 0.0 <sup>b</sup>   | 4.4 $\pm$ 0.0 <sup>c</sup>  |
| Ethanol (%)                  | 12.9 $\pm$ 0.2 <sup>a</sup> | 13.1 $\pm$ 0.0 <sup>b</sup> | 12.4 $\pm$ 0.0 <sup>c</sup>  | 13.9 $\pm$ 0.0 <sup>a</sup> | 13.6 $\pm$ 0.0 <sup>b</sup>  | 13.0 $\pm$ 0.1 <sup>c</sup> |
| Residual Sugar (g/L)         | 6.2 $\pm$ 2.7 <sup>a</sup>  | 2.1 $\pm$ 0.1 <sup>b</sup>  | 1.2 $\pm$ 0.1 <sup>b</sup>   | 2.2 $\pm$ 0.2 <sup>a</sup>  | 2.7 $\pm$ 0.3 <sup>b</sup>   | 2.1 $\pm$ 0.0 <sup>c</sup>  |
| Total Acidity (g/L)          | 9.3 $\pm$ 0.2 <sup>a</sup>  | 6.6 $\pm$ 0.0 <sup>b</sup>  | 7.6 $\pm$ 0.0 <sup>c</sup>   | 8.9 $\pm$ 0.0 <sup>a</sup>  | 7.2 $\pm$ 0.0 <sup>b</sup>   | 7.8 $\pm$ 0.1 <sup>c</sup>  |
| Volatile Acidity (g/L)       | 0.5 $\pm$ 0.0 <sup>a</sup>  | 0.4 $\pm$ 0.0 <sup>b</sup>  | 0.4 $\pm$ 0.0 <sup>b</sup>   | 0.4 $\pm$ 0.0 <sup>a</sup>  | 0.4 $\pm$ 0.0 <sup>a</sup>   | 0.5 $\pm$ 0.0 <sup>b</sup>  |
| Free SO <sub>2</sub> (mg/L)  | 1.6 $\pm$ 0.8 <sup>a</sup>  | 7.8 $\pm$ 0.2 <sup>b</sup>  | 6.7 $\pm$ 0.2 <sup>b</sup>   | 10.1 $\pm$ 0.2 <sup>a</sup> | 7.5 $\pm$ 5.2 <sup>a</sup>   | 5.9 $\pm$ 0.4 <sup>a</sup>  |
| Total SO <sub>2</sub> (mg/L) | 48.5 $\pm$ 3.2 <sup>a</sup> | 60.7 $\pm$ 6.0 <sup>a</sup> | 63.5 $\pm$ 14.9 <sup>a</sup> | 83.6 $\pm$ 3.5 <sup>a</sup> | 68.5 $\pm$ 19.3 <sup>a</sup> | 73.4 $\pm$ 7.0 <sup>a</sup> |

FR = Free Run, LP = Light Press and HP = Heavy Press. Letters (a,b,c) represent homogeneous subsets as determined by Tukey's HSD.

**Table S5.** Simplified PERMANOVA.

|                   | df | F.Model | R <sup>2</sup> | p-value |
|-------------------|----|---------|----------------|---------|
| Fraction          | 2  | 140.881 | 0.681          | 0.001   |
| Vineyard          | 1  | 64.819  | 0.157          | 0.001   |
| Fraction:Vineyard | 2  | 27.529  | 0.133          | 0.001   |
| Residuals         | 12 | -       | 0.029          | -       |
| Total             | 17 | -       | 1.000          | -       |
